# Supplementary material
Source: PubMed Central journal article supplement (PMC4864979)
Supplement: NIHMS715401-supplement.pdf [file NIHMS715401-supplement.pdf]

Discovery and structure of a new inhibitor scaffold of the autophagy initiating kinase ULK1

Michael B. Lazarus and Kevan M. Shokat\*

Supplementary Information



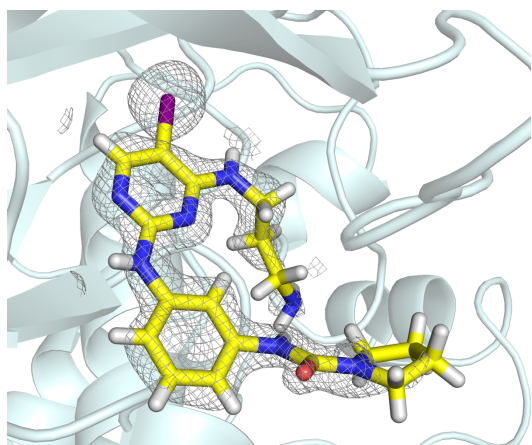

**Supplementary Figure 2. Compound 3 bound to ULK1.** The electron density is shown as an Fo-Fc omit map, contoured at  $3\sigma$ . The weaker density around the pyrrolidine group suggests its flexibility within the active site in this structure.

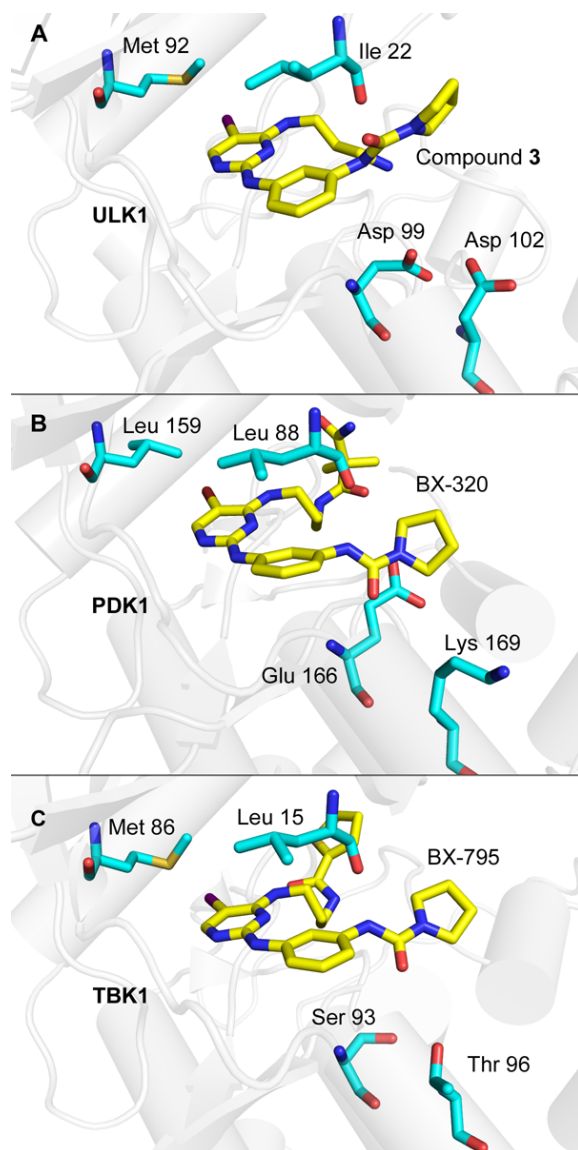

**Supplementary Figure 3. Structures of kinases bound to the BX-795 scaffold.** Key residues that are in close proximity to the inhibitor and show variability between the three kinases are highlighted. The inhibitor is shown in yellow and the kinase sidechains in cyan. (A) Structure of ULK1 (this study). Hydrogen atoms have been omitted for clarity. (B) Structure of PDK1[1]. (C) Structure of TBK1[2].

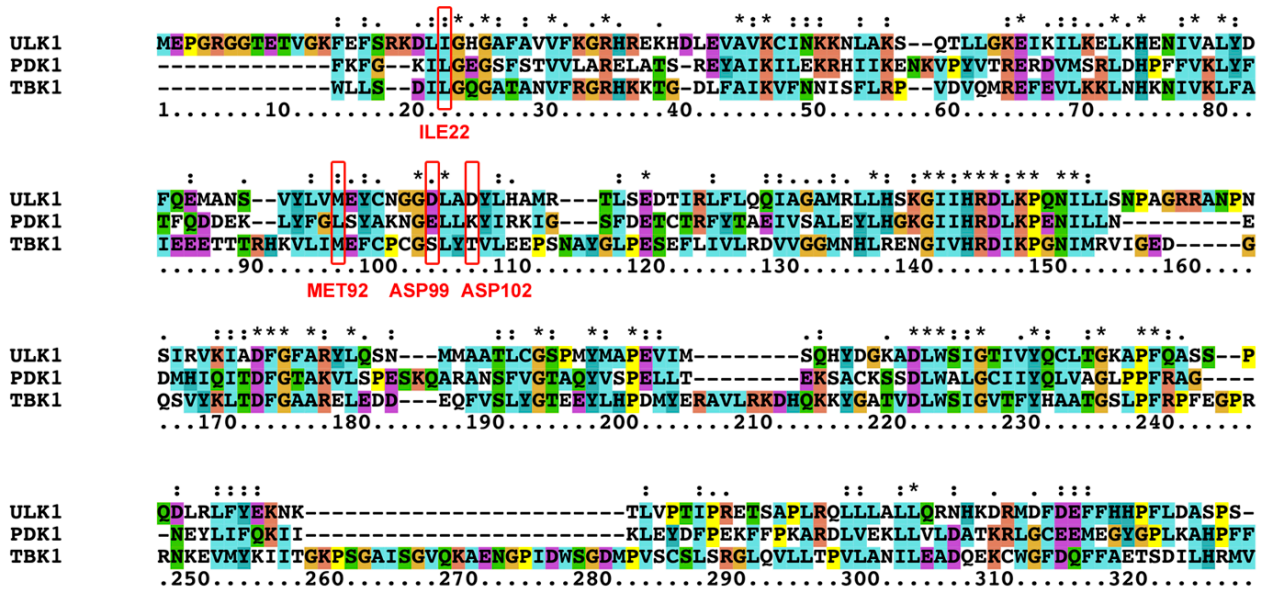

**Supplementary Figure 4. Alignment of ULK1, PDK1, and TBK1.** Residues mentioned in the text are highlighted with red boxes. The labels refer to the residue in ULK1. Alignment was performed using ClustalX[3].

## References

- [1] R.I. Feldman, J.M. Wu, M.A. Polokoff, M.J. Kochanny, H. Dinter, D. Zhu, S.L. Biroc, B. Alicke, J. Bryant, S. Yuan, B.O. Buckman, D. Lentz, M. Ferrer, M. Whitlow, M. Adler, S. Finster, Z. Chang, D.O. Arnaiz, Novel small molecule inhibitors of 3-phosphoinositide-dependent kinase-1, *J. Biol. Chem.*, 280 (2005) 19867-19874.
- [2] X. Ma, E. Helgason, Q.T. Phung, C.L. Quan, R.S. Iyer, M.W. Lee, K.K. Bowman, M.A. Starovasnik, E.C. Dueber, Molecular basis of Tank-binding kinase 1 activation by transautophosphorylation, *Proc. Natl. Acad. Sci. U. S. A.*, 109 (2012) 9378-9383.
- [3] F. Jeanmougin, J.D. Thompson, M. Gouy, D.G. Higgins, T.J. Gibson, Multiple sequence alignment with Clustal X, *Trends Biochem. Sci.*, 23 (1998) 403-405.
